# Supplementary material for: Screening for Best Neuronal-Glial Differentiation Protocols of Neuralizing Agents Using a Multi-Sized Microfluidic Embryoid Body Array
Source: MDPI journal article supplement (doi:10.3390/pharmaceutics14020339), 2022-01-31
Supplement: s1 [file s1]

# Supplementary Materials: Screening for Best Neuronal-Glial Differentiation Protocols of Neuralizing Agents Using a Multi-Sized Microfluidic Embryoid Body Array

Christoph Eilenberger, Mario Rothbauer, Konstanze Brandauer, Sarah Spitz, Eva-Kathrin Ehmoser, Seta Küpcü and Peter Ertl

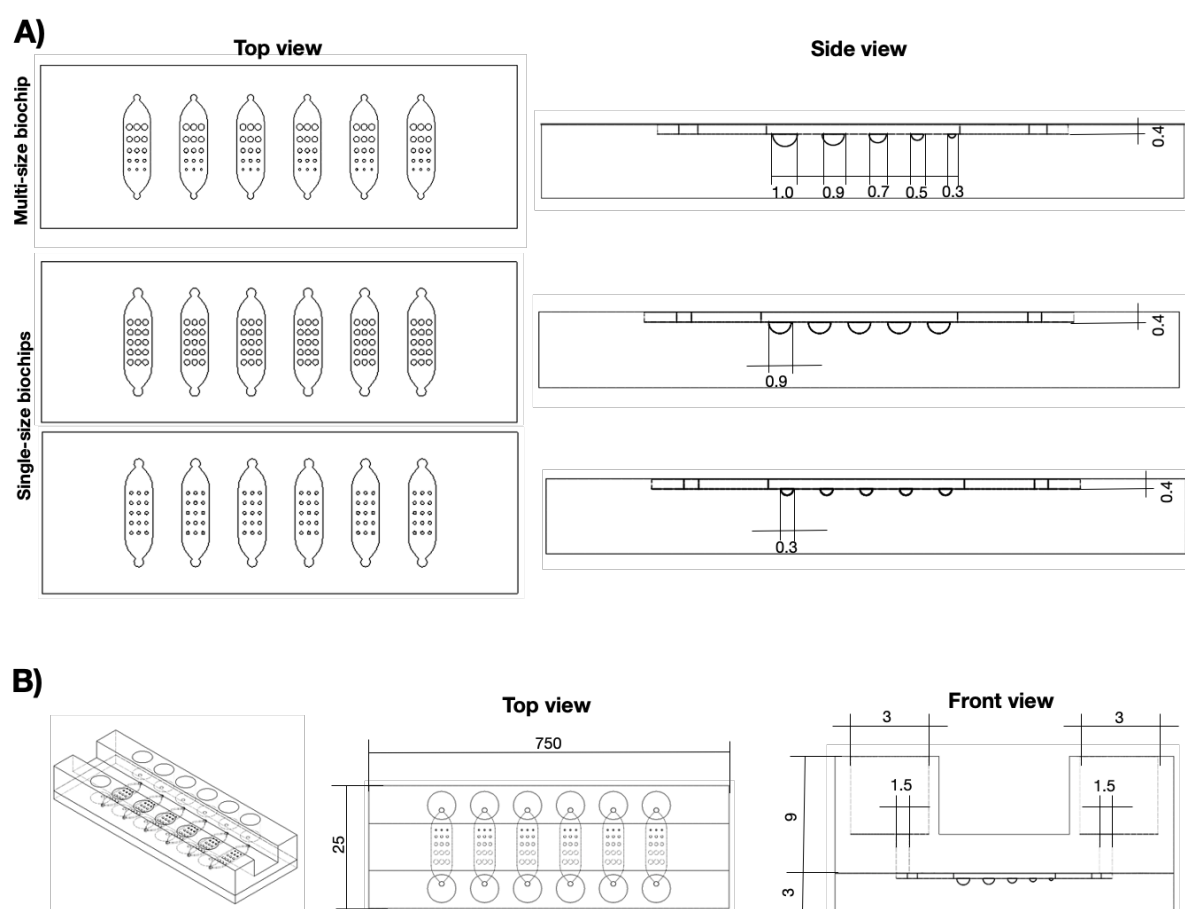

**Figure S1.** Schematic drawing of the three microfluidic spheroid array designs with (A) top and side view of the microcavitiy arrays, and (B) top and front view on the microarray slide.

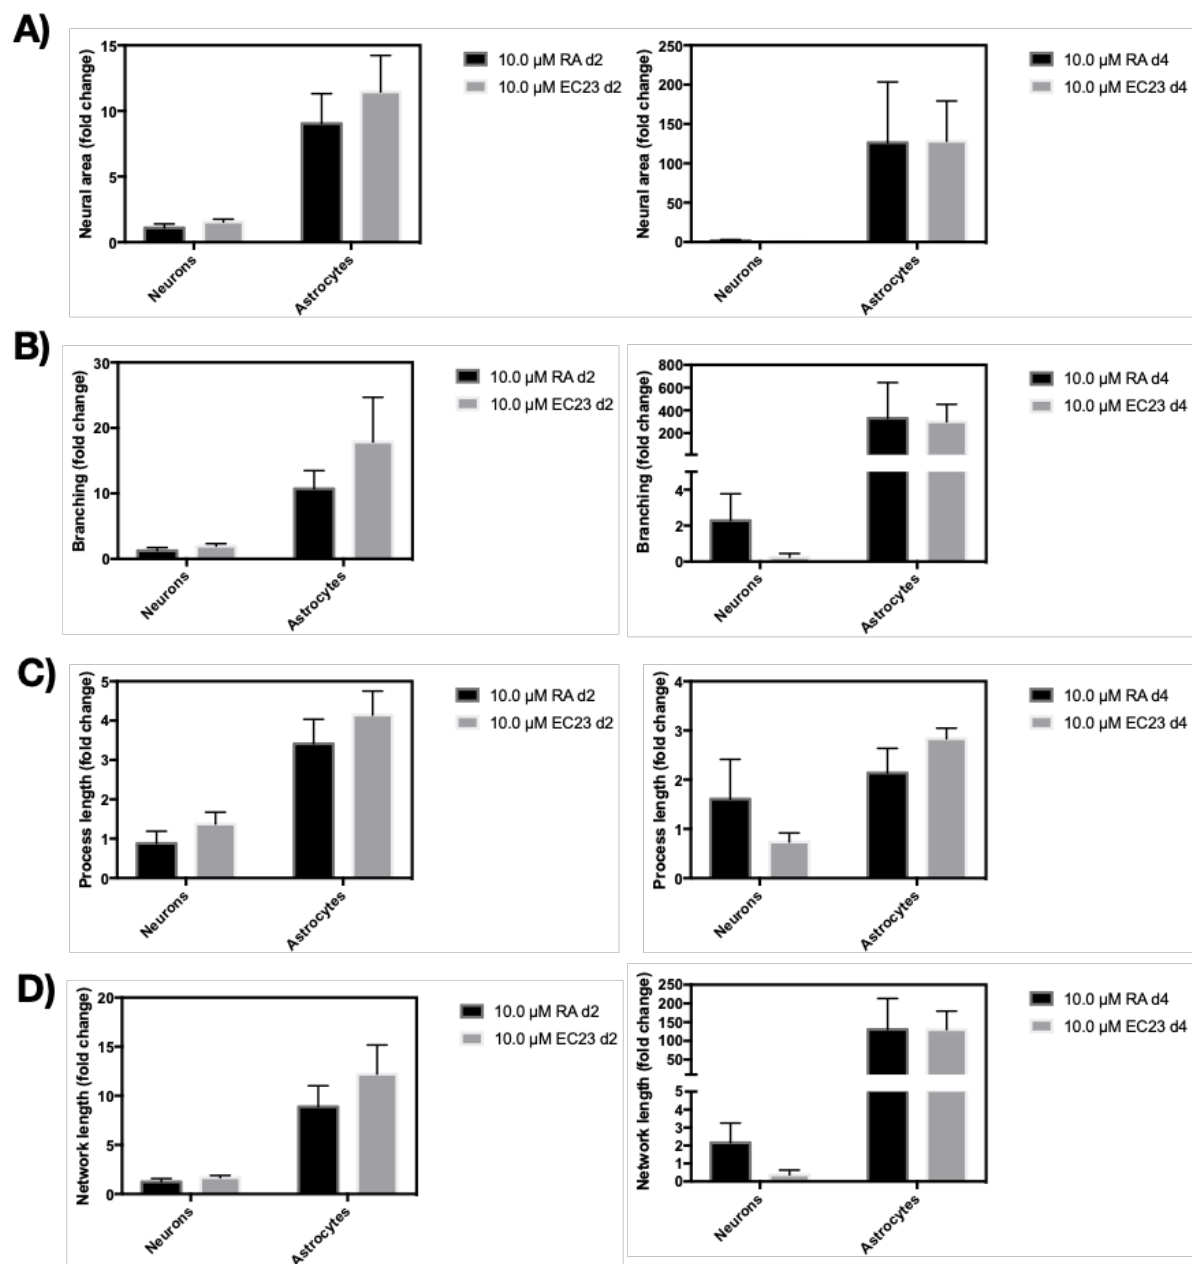

**Figure S2.** Comparative morphometric analysis of neuronal and astrocytic parameters including (A) area, (B) branching, (C) process length, and (D) network length for EBs generated with 2- and 4-day RA and EC23 induction protocols,  $n = 3 \pm \text{SD}$ .

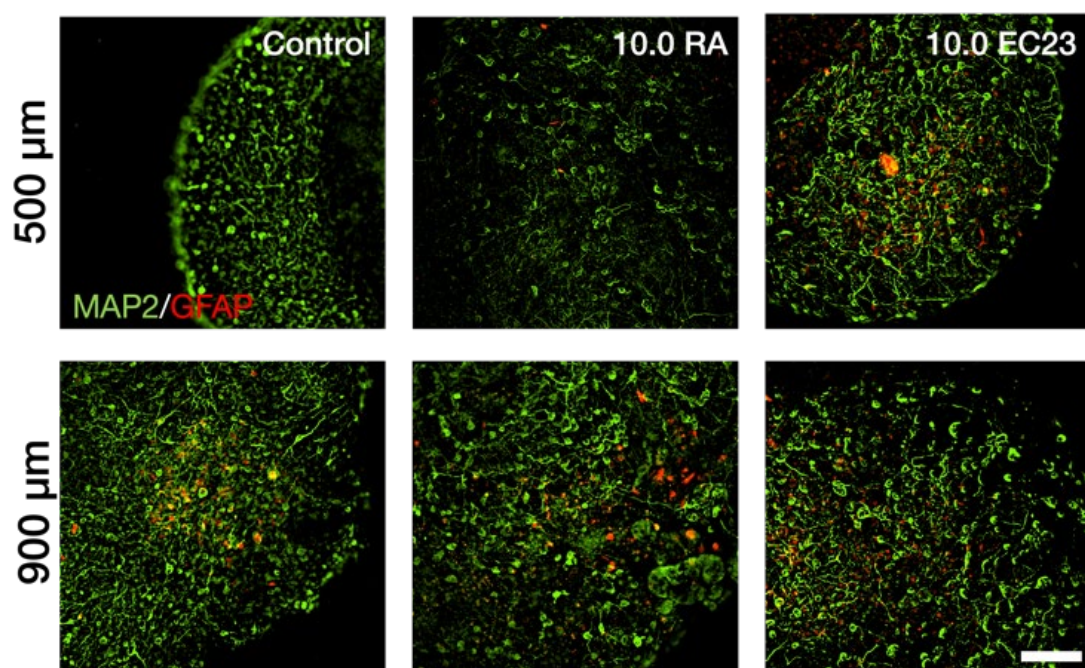

**Figure S3.** Immunofluorescence micrographs of neurons (MAP2, green) and astrocytes (GFAP; red) after 4-day exposure to retinoic acid (RA) or EC23 and 14 days of differentiation of small (500 μm) and large (900 μm) embryoid bodies on-chip. Scale bar, 100 μm.
